# Supplementary material for: Firmicutes, Bacteroidetes and Actinobacteria in Human Milk and Maternal Adiposity
Source: MDPI journal article supplement (doi:10.3390/nu14142887), 2022-07-14
Supplement: s1 [file s1]

**Supplementary Table S1.** Quantitative variables of lactating mothers and their infants ( $n = 70$ ).

| Variable             | Median | IQR (25-75) | Min and max |
|----------------------|--------|-------------|-------------|
| Age (years)          | 30     | 25-32       | 17-40       |
| Pregnancy number     | 1      | 1-2         | 1-6         |
| Infant's age (weeks) | 10.50  | 6-15        | 4-18        |

**Supplementary Table S2.** Qualitative variables of lactating mothers and their infants ( $n = 70$ ).

|                                | <b>Variable</b>                     | <b>Frecuency</b> | <b>(%)</b> |
|--------------------------------|-------------------------------------|------------------|------------|
| <b>Marital Status</b>          | Single                              | 9                | 12.9       |
|                                | Merried                             | 50               | 71.4       |
|                                | Unmarried cohabitation              | 11               | 15.7       |
| <b>Scholarship</b>             | Elementary School                   | 1                | 1.4        |
|                                | Secondary School                    | 2                | 2.9        |
|                                | Undergraduate high school           | 2                | 2.9        |
|                                | High school                         | 9                | 12.9       |
|                                | Specialized professional technician | 2                | 2.9        |
|                                | Incomplete bachelor's degree        | 9                | 12.9       |
|                                | Bachelor's degree                   | 25               | 35.7       |
|                                | Posgraduate                         | 18               | 25.7       |
| <b>Occupation</b>              | Student                             | 6                | 8.6        |
|                                | House wife                          | 21               | 30         |
|                                | Employee                            | 3                | 4.3        |
|                                | Business woman                      | 3                | 4.3        |
|                                | Profesional                         | 35               | 50         |
|                                | Other                               | 2                | 2.9        |
| <b>Type of delivery</b>        | Vaginal delivery                    | 26               | 37.1       |
|                                | Caesarean section                   | 44               | 62.9       |
| <b>Gender of the infant</b>    | Famale                              | 25               | 35.7       |
|                                | Male                                | 45               | 64.3       |
| <b>Type of breastfeeding *</b> | Exclusive breastfeeding             | 50               | 71.4       |
|                                | Partial breastfeeding               | 20               | 28.6       |

\* Vásquez-Garibay, 2016.
